# Supplementary material
Source: PubMed Central journal article supplement (PMC6644617)

# Supporting Information

High yields of bio-oils from hydrothermal processing of thin black liquor without the use of catalysts or capping agents.

*Alexander Orebom, † J. Johan Verendel, † and Joseph S. M. Samec ‡\**

†Renfuel AB, Department of Chemistry, BMC, Uppsala University Husargatan 3, 75123 Uppsala (Sweden). E-mails: alexander.orebom@renfuel.se, johan.verendel@renfuel.se

‡Renfuel AB, Department of Organic Chemistry, Stockholm University 106 91, Stockholm, Sweden. E-mail: joseph.samec@su.se

KEYWORDS: Black liquor, hydrothermal liquification, bio oil

Spectra and graphs:

<sup>1</sup>H NMR (d-DMSO). Brown: acidified and dried black liquor (16% DS). Black: bio-oil.

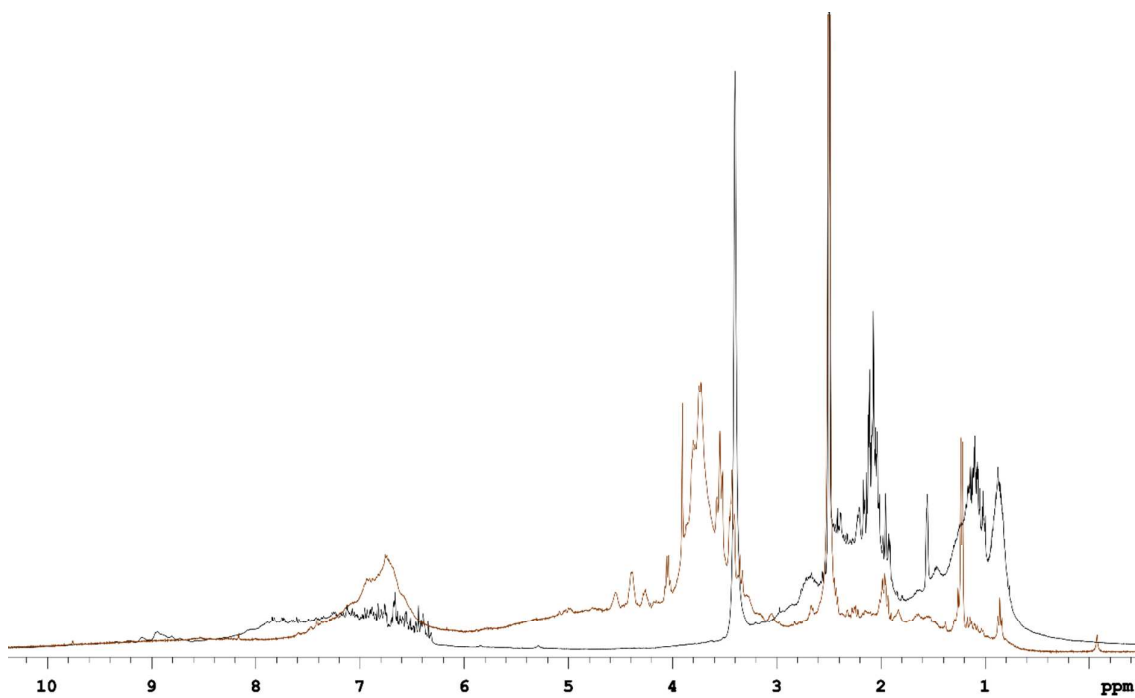

$^{31}\text{P}$  NMR. Bio-oil functionalised with 2-chloro-4,4,5,5-tetramethyl-1,3,2-dioxaphospholane.

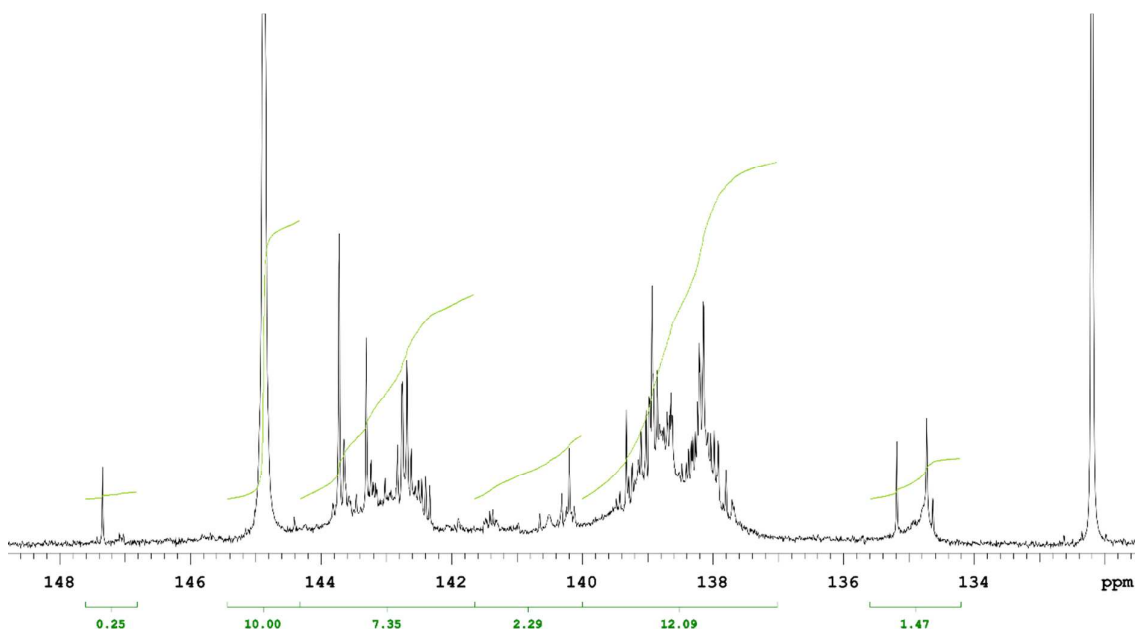

gHMBCAD of acidified and dried black liquor (16% DS).

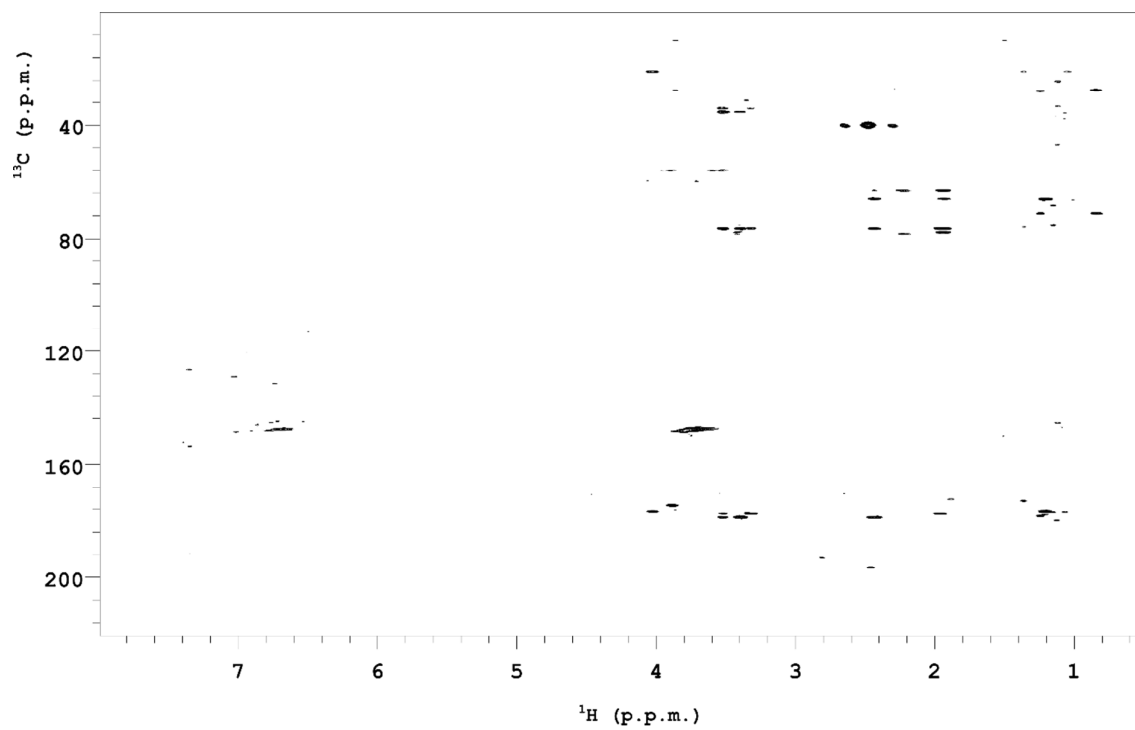

gHMBCAD of bio-oil.

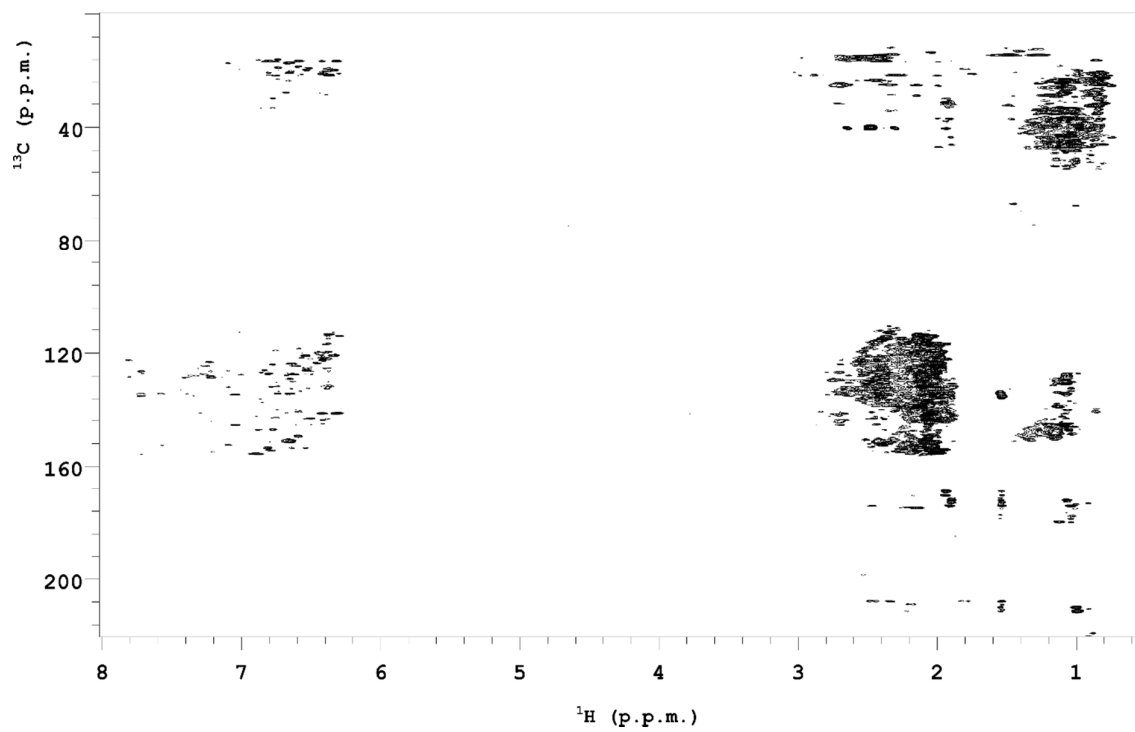

Simulated distillation by IP507.

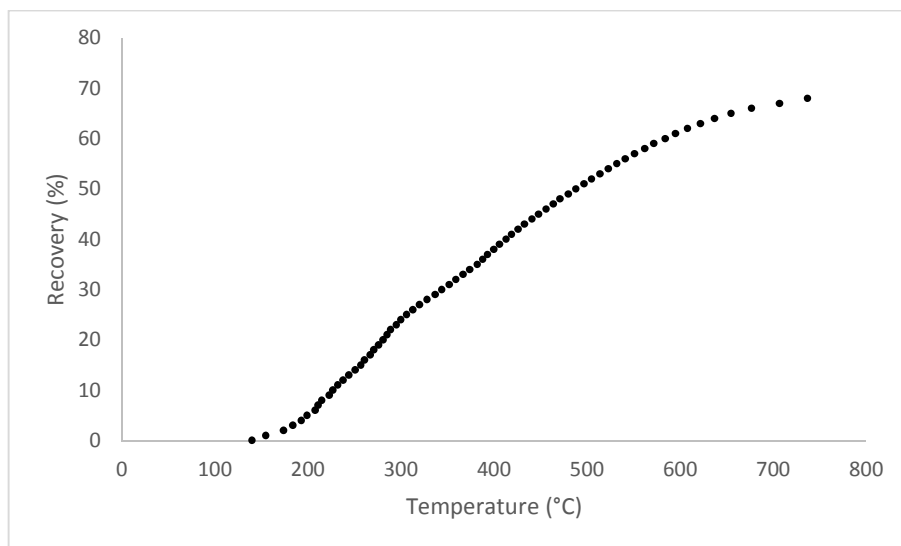

Complementary table for Figure 2.

| <b>Lign. Conc.</b><br><b>(%)</b> | <b>DS</b><br><b>(%)</b> | <b>Char</b><br><b>(%)</b> | <b>Bio oil</b><br><b>(%)</b> |
|----------------------------------|-------------------------|---------------------------|------------------------------|
| 4.7                              | 16.0                    | 6.8                       | 69.9                         |
| 4.7                              | 16.0                    | 7.3                       | 74.8                         |
| 10.0                             | 34.1                    | 24.5                      | 63.4                         |
| 10.1                             | 34.4                    | 25.2                      | 62.2                         |
| 14.4                             | 49.1                    | 35.0                      | 53.6                         |
| 14.8                             | 50.5                    | 33.6                      | 59.2                         |
| 17.7                             | 60.4                    | 40.1                      | 51.4                         |
| 18.1                             | 61.8                    | 39.8                      | 58.4                         |

MALDI spectrum.

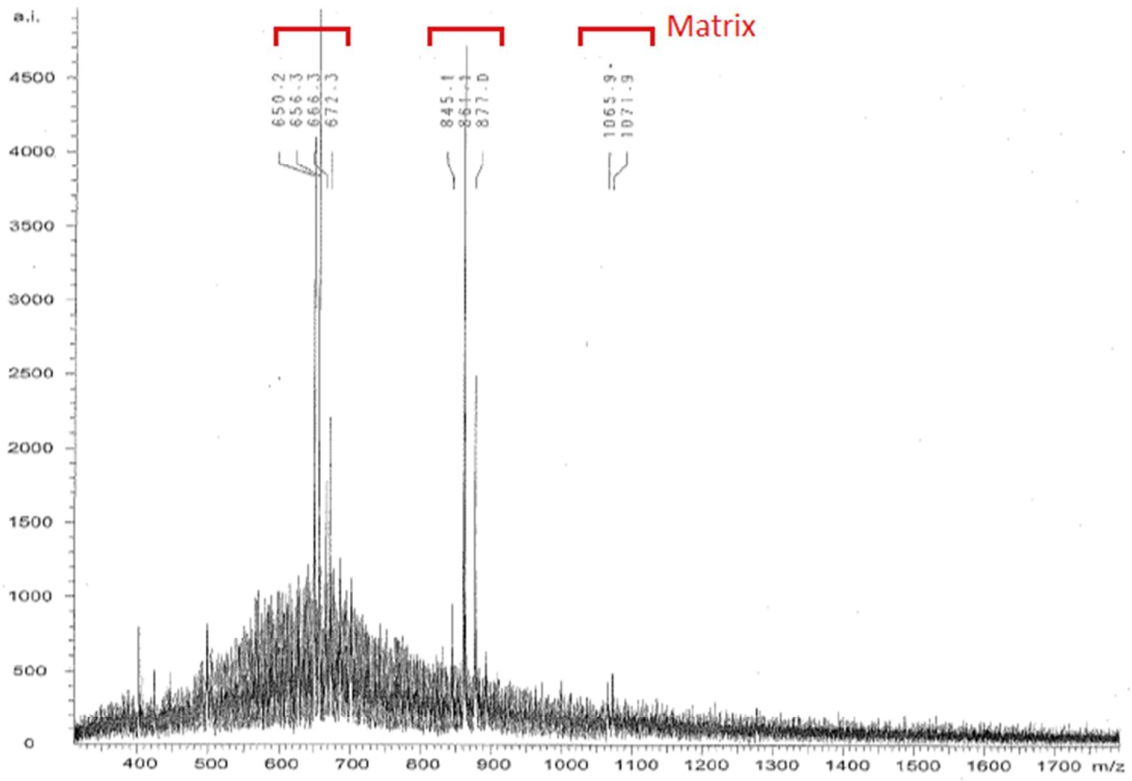

Supplement: ao8b00854_si_001.pdf [file ao8b00854_si_001.pdf]
